# Supplementary material for: Moving Food Assistance into the Digital Age: A Scoping Review
Source: MDPI journal article supplement (doi:10.3390/ijerph19031328), 2022-01-25
Supplement: s1 [file s1]

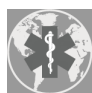

**Table S1.** Search term example: SCOPUS

| SCOPUS Search Strategy                        |                                                                                                                                                                                                                                                                                                                                                                                                                                                                                                                                                                                                                                                                                                |            |
|-----------------------------------------------|------------------------------------------------------------------------------------------------------------------------------------------------------------------------------------------------------------------------------------------------------------------------------------------------------------------------------------------------------------------------------------------------------------------------------------------------------------------------------------------------------------------------------------------------------------------------------------------------------------------------------------------------------------------------------------------------|------------|
| Concept                                       | Search Query                                                                                                                                                                                                                                                                                                                                                                                                                                                                                                                                                                                                                                                                                   | Results    |
| #1: food assistance                           | "Food assistance" OR "Food Supply" or "food bank" or "free food" or "#freefood" "food security" or "food insecurity" or "food kitchen" or "food pantry" or "soup kitchen" or "community kitchen" or "food distribution" or "food box" or "SNAP" or "WIC" or "food aid" or "hunger" or "food first responder" or "feed the hungry" or "free meal" or "community pantr*" or "food service" OR "meal service" OR "community meal" or "foodbank" or "food stamp" or "emergency food"                                                                                                                                                                                                               | 15,495     |
| #2: app features                              | "inventory" or "management" or "volunteer" or "training" or "project management" or "education" or "messaging" or "chat" or "preparedness" or "organization" or "command" or "communications" or "ordering" or "guidelines" or "features" or "client" or "tracking" or "dashboard" or "report" or "track" or "calendar" or "recruitment" or "choice" or "echoice" or "smart choice" or "machine learning" or "forecasting"                                                                                                                                                                                                                                                                     | 20,922,785 |
| #3: Names of grey literature food pantry apps | "Pantri" or "smart choice" or "pantry worx" or "link2feed" or "food pantry manager" or "food pantry helper" or "pantry soft" or "the online food pantry" or "Flemington food pantry" or "lakeview pantry" or "plentiful" or "Connecticut food bank" or "abundance"                                                                                                                                                                                                                                                                                                                                                                                                                             | 312        |
| #4: digital                                   | App OR apps OR digital OR digitally OR online OR "on-line" OR internet* OR "web based" OR website* OR virtual* OR blog* OR "chat room*" OR chatbot* OR crowdsourc* OR "crowd sourc*" OR cyber OR "electronic mail" OR email OR "e-mail*" OR "ICT" OR "information and communication technolog*" OR "information communication technolog*" OR "information technolog*" OR "instant messag*" OR "IOT" OR "e health" OR ehealth OR mHealth OR "mobile health" OR "mobile phone*" OR "cell phone*" OR cellphone* OR "cellular phone*" OR "smart phone*" OR smartphone* OR "phone screen*" OR android* OR ipad* OR iphone* OR "social media" OR "social network*" OR facebook OR Instagram OR "text | 4,256,890  |

|                         |                                                                                                                                                                                                                                                                                                                                                                                                                                                                                                                                                                                                                                                                                                                                                                                                                                                                       |            |
|-------------------------|-----------------------------------------------------------------------------------------------------------------------------------------------------------------------------------------------------------------------------------------------------------------------------------------------------------------------------------------------------------------------------------------------------------------------------------------------------------------------------------------------------------------------------------------------------------------------------------------------------------------------------------------------------------------------------------------------------------------------------------------------------------------------------------------------------------------------------------------------------------------------|------------|
| <p>#5: Final Result</p> | <p>             messag* OR texting OR tweet* OR twitter OR sms OR snapchat* OR<br/>             Zoom* OR "google meet*" OR Webex OR "search engine*" OR "tablet<br/>             system*" OR "mobile application*" OR "mobile device*" OR "mobile<br/>             technolog*" OR "mobile comput*" OR "apple application*" OR "device<br/>             application*" OR "phone application*" OR "computing application*" OR<br/>             "Microsoft application*" OR "mac application*" OR "google application*" OR<br/>             "chat application*" OR "messaging application*" OR "interactive<br/>             application*" OR "tablet application*" OR "computer application*" OR<br/>             "web application*" OR "food application*" OR "nutrition application*" OR<br/>             "software application*" OR "software design"           </p> | <p>764</p> |
|-------------------------|-----------------------------------------------------------------------------------------------------------------------------------------------------------------------------------------------------------------------------------------------------------------------------------------------------------------------------------------------------------------------------------------------------------------------------------------------------------------------------------------------------------------------------------------------------------------------------------------------------------------------------------------------------------------------------------------------------------------------------------------------------------------------------------------------------------------------------------------------------------------------|------------|

**Table S2.** Tools by implemented features.

[illegible]

|                                    |   |   |   |   |   |   |   |   |   |   |   |
|------------------------------------|---|---|---|---|---|---|---|---|---|---|---|
| Flemington Food<br>Pantry Ordering | x |   |   |   |   |   |   | x |   |   |   |
| Food eTalk                         |   |   |   |   |   |   | x |   |   | x |   |
| Food Pantry Helper                 | x |   | x | x |   | x | x | x | x |   | x |
| Food Pantry<br>Manager             | x |   | x |   |   |   |   | x |   | x | x |
| Food Rescue Robot                  |   |   |   |   |   | x | x |   |   | x | x |
| Hamad et al.                       | x |   |   |   |   |   |   |   |   |   |   |
| Healthy Pantry<br>Program          |   |   |   |   |   |   |   | x |   |   |   |
| Herron et al.                      |   |   | x |   |   |   |   |   |   |   |   |
| Lakeview Pantry<br>Online Market   | x | x |   |   |   |   | x | x |   |   |   |
| Link2Feed                          | x |   |   | x |   |   | x |   |   | x | x |
| Martin et al.                      |   |   |   |   |   |   |   | x |   |   |   |
| Maya, the Texas WIC<br>ChatBot     |   |   | x |   |   |   |   |   |   |   |   |
| Midnorth Food<br>Pantry            |   |   |   |   |   |   |   |   |   |   | x |
| my WIC Family                      |   |   |   |   |   |   |   | x |   | x |   |
| NEED2FEED                          |   |   |   |   |   |   |   |   |   |   | x |
| Nourishing Our<br>Community        |   |   |   |   |   |   |   | x |   |   |   |
| Pantri                             | x |   | x | x | x |   | x | x |   | x | x |
| Pantry Soft                        | x |   |   |   |   |   | x | x |   | x |   |
| Pantry Worx                        | x |   |   |   |   |   | x |   |   | x |   |
| Plentiful App                      | x |   |   |   |   |   |   |   | x | x |   |
| Rogus et al.                       |   |   |   |   |   |   |   | x |   |   |   |
| Scott et al.                       | x |   |   |   |   |   |   |   |   |   |   |
| Smart Choice Pantry                |   |   |   |   |   |   | x | x |   | x |   |
| SNAP4CT                            |   |   |   |   |   |   |   | x |   |   | x |
| The Food Locker                    |   |   |   |   |   |   |   | x |   |   |   |

|                           |   |  |   |   |   |  |   |
|---------------------------|---|--|---|---|---|--|---|
| The Online Food<br>Pantry | x |  | x | x | x |  | x |
| Ufot et al.               |   |  |   | x |   |  |   |
| VeggieBook                |   |  |   |   | x |  | x |
| Volgistics                |   |  |   |   |   |  | x |
| WICShopper                |   |  |   |   | x |  |   |
| YourPantry                |   |  |   | x |   |  |   |
| Zimmer et al.             |   |  |   |   | x |  |   |
